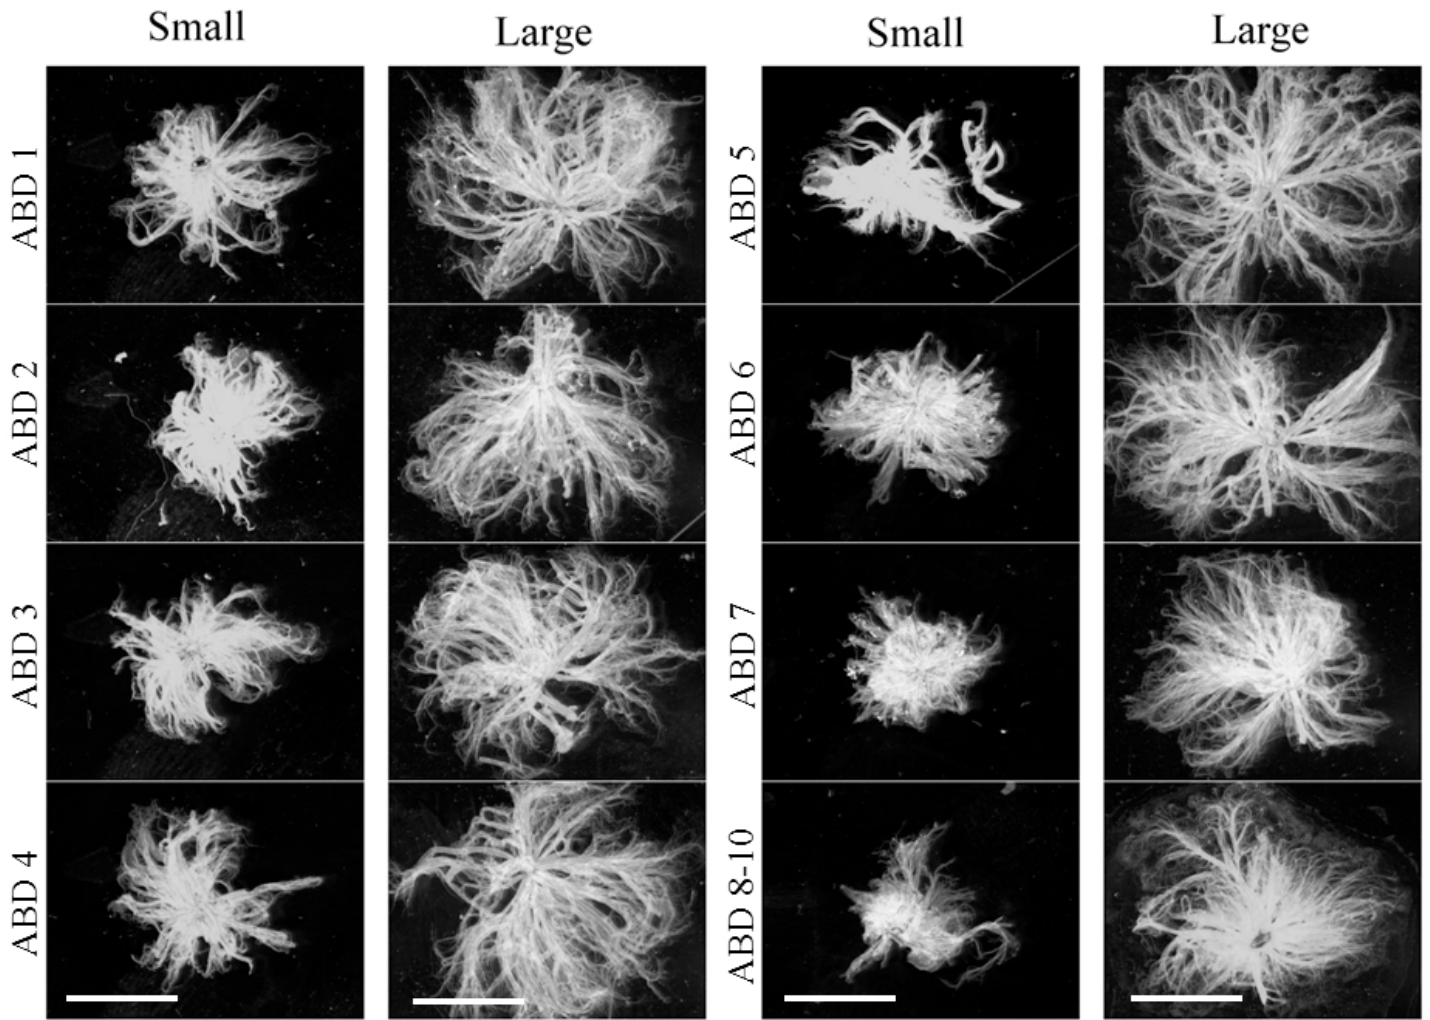

**Fig. S1.** The abdominal tracheal bundles of one small and one large 5th instar *Manduca sexta* caterpillar. Only the tracheae from the right side of the body are presented as there should be symmetry between halves of the body. All images were taken at the same magnification, and white bars represent a length of 3 mm.
